# Supplementary material for: Moderating Effects of BDNF Genetic Variants and Smoking on Cognition in PTSD Veterans
Source: MDPI journal article supplement (doi:10.3390/biom11050641), 2021-04-26
Supplement: s1 [file s1]

Supplementary Table 1. Distribution of BDNF rs6265 and BDNF rs56164415 polymorphisms between smokers and non-smokers in control subjects and veterans with PTSD. The data is shown as total number N and frequency.

| Polymorphism               | Genotype / Allele | Smoking    |     | Statistics                            |
|----------------------------|-------------------|------------|-----|---------------------------------------|
|                            |                   | Yes        | No  |                                       |
|                            |                   | N          | N   |                                       |
| Control subjects (N=120)   | AA                | 1          | 3   | $\chi^2=2.035$ ; df=2; p=0.361        |
|                            | GA                | 25         | 22  |                                       |
|                            | GG                | 41         | 28  |                                       |
|                            | BDNF rs6265       | A carriers | 25  | $\chi^2=0.847$ ; df=1; p=0.357        |
|                            |                   | GG         | 28  |                                       |
|                            | A                 | 27         | 28  | $\chi^2=1.315$ ; df=1; p=0.251        |
|                            | G                 | 107        | 78  |                                       |
|                            | CC                | 55         | 49  | $\chi^2=3.330$ ; df=2; p=0.189        |
|                            | CT                | 2          | 0   |                                       |
|                            | TT                | 10         | 4   |                                       |
|                            | BDNF rs56164415   | T carriers | 4   | $\chi^2=2.750$ ; df=2; p=0.097        |
|                            |                   | CC         | 49  |                                       |
|                            | C                 | 112        | 98  | $\chi^2=4.258$ ; df=1; <b>p=0.039</b> |
|                            | T                 | 22         | 8   |                                       |
| Subjects with PTSD (N=519) | AA                | 8          | 4   | $\chi^2=0.738$ ; df=2; p=0.691        |
|                            | GA                | 125        | 57  |                                       |
|                            | GG                | 211        | 114 |                                       |
|                            | BDNF rs6265       | A carriers | 61  | $\chi^2=0.718$ ; df=1; p=0.397        |
|                            |                   | GG         | 114 |                                       |
|                            | A                 | 141        | 65  | $\chi^2=0.539$ ; df=1; p=0.463        |
|                            | G                 | 547        | 285 |                                       |
|                            | CC                | 250        | 136 | $\chi^2=1.811$ ; df=2; p=0.404        |
|                            | BDNF rs56164415   | CT         | 37  |                                       |
|                            |                   | TT         | 2   |                                       |

|            |     |     |                                   |
|------------|-----|-----|-----------------------------------|
| T carriers | 94  | 39  | $\chi^2=1.546$ ; df=1;<br>p=0.214 |
| CC         | 250 | 136 |                                   |
| C          | 591 | 309 | $\chi^2=1.144$ ; df=1;<br>p=0.285 |
| T          | 97  | 41  |                                   |

BDNF - brain derived neurotrophic factor;  $\chi^2$  – chi-square test

Supplementary Table 2. PANSS cognitive subscale scores in control subjects and veterans with PTSD, depending on the smoking status and BDNF rs6265 and BDNF rs56164415 polymorphism. The data is shown as median and interquartile range (25<sup>th</sup>; 75<sup>th</sup> percentile), while p values in bold represent statistical significance.

| Smoking     | Polymorphism    | Genotype / Allele | PANSS cognitive subscale scores |                                     |                    |                                      |
|-------------|-----------------|-------------------|---------------------------------|-------------------------------------|--------------------|--------------------------------------|
|             |                 |                   | Control subjects                | Statistics                          | Subjects with PTSD | Statistics                           |
| Smokers     | BDNF rs6265     | AA                | 6 (6; 6)                        | H=8.373;<br>df=2;<br><b>p=0.015</b> | 6 (5; 8)           | H=6.647;<br>df=2;<br><b>p=0.036</b>  |
|             |                 | GA                | 4 (4; 4)                        |                                     | 7 (6; 9)           |                                      |
|             |                 | GG                | 4 (4; 4)                        |                                     | 7 (5; 8)           |                                      |
|             |                 | A carriers        | 4 (4; 4)                        | U=493.0;<br>p=0.361                 | 7 (6; 8)           | U=12090.5;<br><b>p=0.029</b>         |
|             |                 | GG                | 4 (4; 4)                        |                                     | 7 (5; 8)           |                                      |
|             |                 | A                 | 4 (4; 4)                        | U=1420.5;<br>p=0.813                | 7 (5; 8)           | U=35181.5;<br>p=0.104                |
|             |                 | G                 | 4 (4; 4)                        |                                     | 7 (5; 8)           |                                      |
|             | BDNF rs56164415 | CC                | 4 (4; 4)                        | H=0.318;<br>df=2;<br>p=0.853        | 6 (5; 8)           | H=10.729;<br>df=2;<br><b>p=0.005</b> |
|             |                 | CT                | 4 (4; 4)                        |                                     | 8 (6; 8)           |                                      |
|             |                 | TT                | 4 (4; 4)                        |                                     | 6 (5; 7)           |                                      |
|             |                 | T carriers        | 4 (4; 4)                        | U=316.5;<br>p=0.695                 | 8 (6; 8)           | U=9327.0;<br><b>p=0.003</b>          |
|             |                 | CC                | 4 (4; 4)                        |                                     | 6 (5; 8)           |                                      |
|             |                 | C                 | 4 (4; 4)                        | U=1194.0;<br>p=0.685                | 7 (5; 8)           | U=24113.5;<br><b>p=0.011</b>         |
|             |                 | T                 | 4 (4; 4)                        |                                     | 8 (6; 8)           |                                      |
| Non smokers | BDNF rs6265     | AA                | 4 (4; 4)                        | H=2.010;<br>df=2;<br>p=0.366        | 6 (5; 7)           | H=0.869;<br>df=2;<br>p=0.647         |
|             |                 | GA                | 4 (4; 4)                        |                                     | 6 (5; 8)           |                                      |
|             |                 | GG                | 4 (4; 4)                        |                                     | 6 (5; 8)           |                                      |
|             |                 | A carriers        | 4 (4; 4)                        | U=320.5;<br>p=0.251                 | 6 (5; 8)           | U=3262.0;<br>p=0.495                 |
|             |                 | GG                | 4 (4; 4)                        |                                     | 6 (5; 8)           |                                      |
|             |                 | A                 | 4 (4; 4)                        | U=1045.0;<br>p=0.462                | 6 (5; 8)           | U=8681.5;<br>p=0.424                 |
|             |                 | G                 | 4 (4; 4)                        |                                     | 6 (5; 8)           |                                      |
|             | BDNF rs56164415 | CC                | 4 (4; 4)                        | U=53.0;<br><b>p=0.001</b>           | 6 (5; 8)           | H=8.418;<br>df=2;<br><b>p=0.015</b>  |
|             |                 | CT                | .                               |                                     | 7 (6; 8)           |                                      |
|             |                 | TT                | 5 (4; 6)                        |                                     | 9 (7; 10)          |                                      |

|            |          |                   |          |                |
|------------|----------|-------------------|----------|----------------|
| T carriers | 5 (4; 6) | U=53.0;           | 7 (6; 8) | U=1892.5;      |
| CC         | 4 (4; 4) | <b>p=0.001</b>    | 6 (5; 8) | <b>p=0.006</b> |
| C          | 4 (4; 4) | U=212.0;          | 6 (5; 8) | U=4614.5;      |
| T          | 5 (4; 6) | <b>p&lt;0.001</b> | 7 (6; 8) | <b>p=0.004</b> |

BDNF - brain derived neurotrophic factor; H – Kruskal-Wallis test statistics; PANSS - Positive and Negative Syndrome Scale; U – Mann-Whitney test statistics value

Supplementary Table 3. ROCF Copy, Immediate and Delayed Recall Test scores in all veterans and in veterans with PTSD, depending on the smoking status and BDNF rs56164415 polymorphism. Results are shown as median and interquartile range (25<sup>th</sup>; 75<sup>th</sup> percentile), while p values in bold represent statistical significance.

| Polymorphism                       | Genotype / Allele | ROCF<br>Copy | Statistics                   | ROCF<br>Immediate<br>Recall | Statistics                           | ROCF<br>Delayed<br>Recall | Statistics                |
|------------------------------------|-------------------|--------------|------------------------------|-----------------------------|--------------------------------------|---------------------------|---------------------------|
| All veterans<br>BDNF<br>rs56164415 | CC                | 20 (20; 20)  | H=1.036;<br>df=2;<br>p=0.596 | 13 (11; 15)                 | H=11.065;<br>df=2;<br><b>p=0.004</b> | 7 (5; 9)                  | H=5.252;<br>df=2; p=0.072 |
|                                    | CT                | 20 (20; 20)  |                              | 10 (9; 12)                  |                                      | 6 (5; 8)                  |                           |
|                                    | TT                | 20 (20; 20)  |                              | 14 (9; 15)                  |                                      | 7 (6; 9)                  |                           |
|                                    | T carriers        | 20 (20; 20)  | U=2.376.0;<br>p=0.479        | 10 (9; 14)                  | U=1.698.0;<br><b>p=0.003</b>         | 6 (5; 8)                  | U=2.001.0;<br>p=0.071     |
|                                    | CC                | 20 (20; 20)  |                              | 13 (11; 15)                 |                                      | 7 (5; 9)                  |                           |
|                                    | C                 | 20 (20; 20)  |                              | 13 (10; 15)                 |                                      | 7 (5; 9)                  |                           |
|                                    | T                 | 20 (20; 20)  |                              | 11 (9; 14)                  |                                      | 6 (5; 9)                  |                           |
| Smokers<br>BDNF<br>rs56164415      | CC                | 20 (20; 20)  | H=0.306;<br>df=2;<br>p=0.858 | 13 (10; 15)                 | H=7.275;<br>df=2;<br><b>p=0.025</b>  | 7 (6; 10)                 | H=2.124;<br>df=2; p=0.346 |
|                                    | CT                | 20 (20; 20)  |                              | 9 (9; 10)                   |                                      | 6 (5; 8)                  |                           |
|                                    | TT                | 20 (20; 20)  |                              | 14 (14; 14)                 |                                      | 7 (7; 7)                  |                           |
|                                    | T carriers        | 20 (20; 20)  | U=175.5;<br>p=0.771          | 9 (9; 11)                   | U=86.0;<br><b>p=0.024</b>            | 6 (5; 8)                  | U=123.5;<br>p=0.167       |
|                                    | CC                | 20 (20; 20)  |                              | 13 (10; 15)                 |                                      | 7 (6; 10)                 |                           |
|                                    | C                 | 20 (20; 20)  |                              | 12 (10; 15)                 |                                      | 7 (5; 10)                 |                           |
|                                    | T                 | 20 (20; 20)  |                              | 10 (9; 13)                  |                                      | 7 (5; 8)                  |                           |

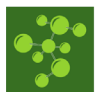

|                                   |            |             |                              |             |                              |             |                           |
|-----------------------------------|------------|-------------|------------------------------|-------------|------------------------------|-------------|---------------------------|
| Non-smokers<br>BDNF<br>rs56164415 | CC         | 20 (20; 20) | H=0.410;<br>df=2;<br>p=0.815 | 13 (11; 15) | H=0.989;<br>df=2;<br>p=0.610 | 7 (5; 9)    | H=2.806;<br>df=2; p=0.246 |
|                                   | CT         | 20 (20; 20) |                              | 14 (11; 16) |                              | 5 (4; 6)    |                           |
|                                   | TT         | 20 (20; 20) |                              | 15 (15; 15) |                              | 10 (10; 10) |                           |
|                                   | T carriers | 20 (20; 20) | U=42.0;<br>p=0.522           | 15 (11; 16) | U=33.5;<br>p=0.390           | 6 (4; 10)   | U=43.0;<br>p=0.766        |
|                                   | CC         | 20 (20; 20) |                              | 13 (11; 15) |                              | 7 (5; 9)    |                           |
|                                   | C          | 20 (20; 20) |                              | 13 (11; 15) |                              | 6 (5; 9)    |                           |
